# Supplementary material
Source: Research Square preprint supplement (doi:10.21203/rs.3.rs-9338335/v1)
Supplement: Supplementary file 1 [file 1c85c8a301d74b130b00a9bc.xlsx]

## Sheet: Sheet1
Gene name	Primer	5'-3' Squence
Il10	Forward	CTTACTGACTGGCATGAGGATCA
	Reverse	GCAGCTCTAGGAGCATGTGG
Lif	Forward	CATTTCCTATTACACAGCTCAAGG
	Reverse	TGGGAAGTCTGTCATGTTAGG
Stat3	Forward	ATCTGTCAGATGCCAAATGC
	Reverse	GAAGAAGTTCACGTTCTTGGG
Il19	Forward	CTCCTGGGCATGACGTTGATT
	Reverse	GCATGGCTCTCTTGATCTCGT
Csf3	Forward	ATGGCTCAACTTTCTGCCCAG
	Reverse	CTGACAGTGACCAGGGGAAC
Actb	Forward	GCTATGTTGCTCTAGACTTCG
	Reverse	GGATTCCATACCCAAGAAGG
Il6	Forward	TACCACTTCACAAGTCGGA
	Reverse	AATTGCCATTGCACAACTC
