# Supplementary material
Source: Research Square preprint supplement (doi:10.21203/rs.3.rs-9338335/v1)
Supplement: Supplementary file 2 [file 4ad882c41fa1020579fa7527.xlsx]

## Sheet: Sheet1
Table S1. The information of compounds in JFZX
Component Name	Response	Formula	Neutral Mass (Da)	m/z	Mass Error (ppm)	Observed RT (min)	Adducts
Hesperidin	C28H34O15	610.19	609.182	-0.2	17.24	4830722	-H, +Cl, +HCOO
Linolic acid	C18H32O2	280.24	279.233	0.8	49.59	3120576	-H, +HCOO
9-Octadecenoic acid	C18H34O2	282.256	281.249	0.4	53.04	2199725	-H, +HCOO
Licoflavone A	C20H18O4	322.121	321.113	0.7	30.12	1980826	-H
Bavachromene	C20H18O4	322.121	321.113	0.7	30.12	1980826	-H
Glycyrrhizic acid	C42H62O16	822.404	823.411	-0.5	26.7	1843262	+H, +Na
Corylifolinin	C20H20O4	324.136	323.129	0.5	36.23	1829179	-H, +HCOO
Citric acid	C6H8O7	192.027	191.02	0.6	3.31	1440055	-H
Saikosaponin D	C42H68O13	780.466	825.465	0.4	27.62	1332980	+HCOO, -H, +CH3COO, +Cl
Bavachinin	C21H22O4	338.152	337.144	-0.3	40.95	1133283	-H
prim-O-Glucosylcimifugin	C22H28O11	468.163	469.17	-0.1	13.76	984101	+H
Liquiritigenin	C15H12O4	256.074	257.081	0.9	15.41	901694	+H
Hexadecanoic acid	C16H32O2	256.24	255.233	0.6	52.12	881419	-H
Isopsoralidin	C20H16O5	336.1	335.093	0.2	33.81	870961	-H, +HCOO
Licarin B	C20H20O4	324.136	323.129	0.5	31.08	765629	-H
Bavachalcone	C20H20O4	324.136	323.129	0.5	31.08	765629	-H
23-O-Acetylsaikosaponin D	C44H70O14	822.477	867.475	0.4	33.3	717194	+HCOO, -H, +Cl
Ginsenoside Rg1	C42H72O14	800.492	845.491	0.4	18.82	701851	+HCOO, -H, +Cl
Icariin	C33H40O15	676.237	677.244	0.6	21.49	664111	+H, +Na
Myristic acid	C14H28O2	228.209	227.202	0	46.77	624027	-H
Cimifugin	C16H18O6	306.11	307.118	0	15.69	600911	+H
Ginsenoside Ro	C48H76O19	956.498	955.491	0.4	24.81	516304	-H, +HCOO
Ginsenoside Rb1	C54H92O23	1108.6	1153.6	1.1	24.01	474250	+HCOO, -H, +Cl
3'-O-Acetylsaikosaponin A	C44H70O14	822.477	867.475	-0.2	29.01	464892	+HCOO, -H, +Cl
Bakuchiol	C18H24O	256.183	255.175	0.3	44.39	462283	-H, +HCOO
6′-O-Acetylsaikosaponin A	C44H70O14	822.477	867.474	-1.1	28.74	451696	+HCOO, -H, +Cl
Corylin	C20H16O4	320.105	319.098	1	32.67	443044	-H
Epimedin C	C39H50O19	822.295	823.302	0.2	21.06	416133	+H, +Na
Saikosaponin F	C48H80O17	928.54	973.538	0.3	25.26	403586	+HCOO, -H, +Cl
Chebulic acid	C14H12O11	356.038	357.045	0	3.36	371445	+H, +Na, +NH4
Neoliquiritin	C21H22O9	418.126	417.119	0	15.37	346036	-H, +Cl
Liquiritin	C21H22O9	418.126	417.119	0	15.37	346036	-H, +Cl
Ursolic acid	C30H48O3	456.36	455.353	-0.4	47.88	339722	-H, +HCOO
Saikosaponin C	C48H78O17	926.524	971.522	-0.2	24.62	335519	+HCOO, -H, +Cl
Quinic acid	C7H12O6	192.063	191.056	-2.7	1.15	330662	-H, +CH3COO, +HCOO
β-Daucosterol (Daucosterol)	C35H60O6	576.439	621.437	-0.9	58.31	321748	+HCOO, -H, +Cl
Ginsenoside Rh2	C36H62O8	622.444	621.437	-0.9	58.31	321748	-H
Atractylenolide I	C15H18O2	230.131	231.138	0.9	30.32	274624	+H
Isoliquiritigenin	C15H12O4	256.074	257.081	1.4	20.35	241123	+H
Ethyl hexadecanoate	C18H36O2	284.272	283.264	-0.8	56.73	239558	-H
Ginsenoside Rd	C48H82O18	946.55	991.549	1.1	26.23	227514	+HCOO, -H, +Cl
Ellagic acid	C14H6O8	302.006	303.015	6	15.6	227030	+H
Ginsenoside Rf	C42H72O14	800.492	845.49	-0.4	22.87	222077	+HCOO, -H, +Cl
Isobavachin	C20H20O4	324.136	323.129	0.5	28.83	220932	-H
Bavachin(Corylifolin)	C20H20O4	324.136	323.129	0.5	28.83	220932	-H
Ginsenoside Rc	C53H90O22	1078.59	1123.59	0.3	25.04	201063	+HCOO, -H, +Cl
Neobavaisoflavone	C20H18O4	322.121	321.113	0.5	30.42	199920	-H
Psorachalcone B (Corylifol B)	C20H20O5	340.131	339.124	-0.1	29.35	196415	-H
Isoliquiritin	C21H22O9	418.126	417.119	0	15.18	194520	-H, +Cl
Hamaudol	C15H16O5	276.1	277.107	1	20.46	194243	+H
Saikosaponin E	C42H68O12	764.471	809.469	-0.4	29.9	193641	+HCOO, -H, +Cl
AtractylenolideⅡ	C15H20O2	232.146	233.154	0.3	35.2	182391	+H, +Na
3β-Hydroxyatractylon	C15H20O2	232.146	233.154	0.3	35.2	182391	+H, +Na
Glabrolide	C30H44O4	468.324	469.331	-0.5	25.74	165168	+H
Arteannuin B	C15H20O3	248.141	247.134	0.9	35.93	164376	-H
Dehydrodiisoeugenol	C20H22O4	326.152	325.144	-0.4	36.95	157673	-H
α-Estradiol	C18H24O2	272.178	271.17	-0.3	40.53	148203	-H, +CH3COO
Kaempferol	C15H10O6	286.048	287.055	1.2	18.19	147686	+H
Ginsenoside Rb2	C53H90O22	1078.59	1123.59	0.9	24.53	147363	+HCOO, -H, +Cl
Schizonepetoside E	C16H28O8	348.178	349.183	-6.6	63.26	133414	+H
Linolenic acid	C18H30O2	278.225	277.217	-0.2	38.29	133274	-H, +HCOO
Rutin	C27H30O16	610.153	609.146	-0.5	15.24	133150	-H
5-O-Methylvisamminol	C16H18O5	290.115	291.123	0.2	19.62	118091	+H
Ferulic acid	C10H10O4	194.058	239.056	0.5	11.43	101138	+HCOO, -H
3,4-Dihydroxycinnamic acid	C9H8O4	180.042	239.056	0.5	11.43	101138	+CH3COO, -H
2-(4-Hydroxybenzyl) malic acid	C11H12O6	240.063	239.056	0.5	11.43	101138	-H
Betaine	C5H11NO2	117.079	118.086	0.6	1.12	94899	+H, +Na
Artemisic acid	C15H22O2	234.162	233.155	-0.2	38.25	94889	-H
Psoralenol	C20H18O5	338.115	337.108	0.2	27.17	94214	-H
Masilinic acid	C30H48O4	472.355	471.348	-0.3	39.27	90336	-H, +HCOO
20(R)-Ginsenoside Rg2	C42H72O13	784.497	829.496	0.1	24.19	83211	+HCOO, -H, +Cl
Nigranoic acid	C30H46O4	470.34	469.332	-1.4	45.1	81570	-H, +HCOO
Coumestrol	C15H8O5	268.037	267.03	0.2	23.55	81242	-H
3β,16α-Dihydroxylanosta-7,9(11),24-trien-21-oic acid	C30H46O4	470.34	471.347	-0.5	26.7	80792	+H
Natsudaidain	C21H22O9	418.126	417.119	0.3	19	77547	-H
Sec-O-glucosylhamaudol	C21H26O10	438.153	439.16	0	20.45	76106	+H, +Na
Ginsenoside Rg2	C42H72O13	784.497	829.495	-0.6	31.85	74168	+HCOO, -H, +Cl
Gallic acid	C7H6O5	170.022	169.014	-0.2	6.5	71208	-H
Saikogenin F	C30H48O4	472.355	471.348	-0.7	37.87	67560	-H, +HCOO
Sophoracoumestan A	C20H14O5	334.084	333.077	-1	36.6	66852	-H
Quercetin-3-O-β-D-glucopyranoside	C21H20O12	464.095	463.088	-0.2	15.78	64745	-H
Oleanolic acid	C30H48O3	456.36	455.353	-0.9	47.14	64567	-H
Orientin	C21H20O11	448.101	447.093	-0.6	17.01	63870	-H, +CH3COO
Psoralidin	C20H16O5	336.1	335.093	0.9	25.57	62838	-H
Undulatoside A	C16H18O9	354.095	353.088	0.1	11.14	58656	-H
Chlorogenic acid	C16H18O9	354.095	353.088	0.1	11.14	58656	-H
Bavacoumestan B	C20H16O6	352.095	351.087	0.1	26.8	58650	-H
Pyruvic acid	C3H4O3	88.016	133.014	-3.2	1.15	55319	+HCOO, -H, +CH3COO
2-Hydroxy-succinic acid	C4H6O5	134.022	133.014	-3.2	1.15	55319	-H
Eicosanoic acid	C20H40O2	312.303	311.296	0	60.51	54013	-H
Sorbitol	C6H14O6	182.079	181.072	-0.5	1.09	52503	-H, +CH3COO, +Cl
Proline	C5H9NO2	115.063	116.071	1.4	1.05	52498	+H, +NH4
Meso-dihydroguaiaretic acid	C20H26O4	330.183	389.197	0.2	33.6	52132	+CH3COO, -H
Shogaol	C17H24O3	276.173	277.18	1.2	28.74	50003	+H
Icaritin	C21H20O6	368.126	369.133	0	29.68	48266	+H
Hesperetin	C16H14O6	302.079	303.087	0.5	17.3	48139	+H
Fragransol C	C21H24O5	356.162	355.155	0.1	35.94	47941	-H
Umbelliferone	C9H6O3	162.032	163.039	2.3	18.01	46607	+H
Magnoflorine	C20H23NO4	341.163	340.156	0.6	13.06	46014	-H, +HCOO
Rhamnetin	C16H12O7	316.058	315.051	0.3	24.23	44350	-H
Quercetin	C15H10O7	302.043	301.035	0	21.11	42376	-H
Luteolin	C15H10O6	286.048	287.055	-0.2	15.86	41640	+H
Octadeca-carboxylic acid	C18H36O2	284.272	283.264	-0.5	44.39	41533	-H
Isochebulic acid	C14H12O11	356.038	357.045	0.3	2.92	38639	+H
Bakuchalcone	C20H20O5	340.131	339.123	-0.8	24.22	38544	-H
8-C-Prenylkaempferol	C20H18O6	354.11	355.117	-0.5	31.53	38174	+H
Licochalcone B	C16H14O5	286.084	285.077	-0.5	20.48	37576	-H
Bavacoumestan A	C20H16O6	352.095	351.087	-0.5	35.35	36998	-H
5,7,4′-Trihydroxyflavone-8-C-α-L-rhamno-pyranosyl-(1→2)-β-D-glucopyranoside	C27H30O14	578.164	577.157	0.3	15	36307	-H
Psorachalcone A	C20H20O5	340.131	339.124	0.2	30.57	32961	-H
Bavachromanol	C20H20O5	340.131	339.124	0.2	30.57	32961	-H
Licurazide	C26H30O13	550.169	551.176	-0.1	18.48	31171	+H
Neobavachalcone	C17H14O5	298.084	297.077	-0.1	36.22	30848	-H
6-Gingerol	C17H26O4	294.183	293.176	0	28.7	29875	-H
18β-Glycyrrhetic acid(Glycyrrhetic acid)	C30H46O4	470.34	471.346	-1.2	41.39	29338	+H
Atractylenolide Ⅲ	C15H20O3	248.141	247.134	-1.3	30.27	28299	-H
Myristicanol B	C22H28O7	404.183	403.175	-2.3	31.72	28029	-H
Biatractylolide	C30H38O4	462.277	461.267	-5	44.38	27291	-H, +CH3COO
Neochebulic acid	C14H12O11	356.038	357.045	-0.1	1.2	26727	+H
Palmitoleic acid	C16H30O2	254.225	253.217	-1	48.05	26535	-H
Saikosaponin A	C42H68O13	780.466	825.464	-0.6	28.97	25200	+HCOO, -H
Kaempferol-3-O-β-D-glucopyranoside	C21H20O11	448.101	449.108	-0.7	15.85	24790	+H
5-Methoxydehydrodiisoeugenol	C21H24O5	356.162	355.158	8.7	52.12	24273	-H
Deltoin	C19H20O5	328.131	327.127	9.1	46.77	24158	-H, +HCOO
Qinghaosu Ⅳ	C15H22O5	282.147	281.139	-0.8	24.83	23764	-H
Behenic acid	C22H44O2	340.334	339.327	1.1	62.64	23320	-H
Deoxyglabrolide	C30H46O3	454.345	453.337	-0.4	56.06	23152	-H
Arjungenin	C30H48O6	504.345	505.352	-0.6	18.93	21733	+H
Xanthotoxin	C12H8O4	216.042	217.05	0.7	23.68	21699	+H
Arteannuin	C15H22O5	282.147	281.139	0.2	23.88	21679	-H
Myristicanol A	C23H30O8	434.194	433.187	0.3	23.24	21523	-H
Phellopterin	C17H16O5	300.1	301.107	0.6	30.82	20607	+H
Fumaric acid	C4H4O4	116.011	115.003	-4	1.29	20543	-H
Saikogenin G	C30H48O4	472.355	471.347	-1.8	38.57	20481	-H, +HCOO
d-Sesamin	C20H18O6	354.11	355.118	-0.3	32.25	20181	+H
2''-O-Rhamno-sylicariside Ⅱ	C33H40O14	660.242	661.25	0.9	28.16	20158	+H
Apigenol	C15H10O5	270.053	271.06	0.4	17.34	19611	+H
Bergapten	C12H8O4	216.042	215.033	-9.9	1.06	19075	-H, +CH3COO, +HCOO
Licobenzofuran	C21H22O5	354.147	355.153	-3.2	31.68	18029	+H
Robinetin	C15H10O7	302.043	303.05	-0.5	15.28	17739	+H
Imperatorin	C16H14O4	270.089	271.097	0.6	23.3	17170	+H
Gomisin D	C28H34O10	530.215	575.214	1.3	30.96	16591	+HCOO, -H, +Cl
6-Methoxyl-7-hydroxycoumarin	C10H8O4	192.042	193.05	1.9	15.17	16565	+H
Scopolin	C16H18O9	354.095	353.088	1.3	11.44	16289	-H
Geranyl acetate	C12H20O2	196.146	195.139	-0.9	31.29	16139	-H
β-Amyrin acetate	C32H52O2	468.397	469.402	-3.5	13.76	15894	+H
Naringenin	C15H12O5	272.068	271.061	-1.4	23.11	15590	-H
Licoricone	C22H22O6	382.142	383.149	-0.2	32.33	15321	+H, +Na
3-Methoxy-4-hydroxybenzoic acid	C8H8O4	168.042	167.035	0.2	8.37	14824	-H
Apocynin D	C30H48O3	456.36	455.353	-0.3	48.63	14760	-H, +HCOO
p-Tolualdehyde	C7H6O2	122.037	121.029	-2.3	12.35	14673	-H
Corylinal	C16H10O5	282.053	281.043	-7.8	33.81	14160	-H, +HCOO
Pinnatifinoside A	C21H18O9	414.095	413.09	5.3	35.93	13782	-H, +CH3COO
Terflavin A	C48H30O30	1086.08	1087.09	-0.6	11.28	13693	+H, +NH4
Neoisoliquiritin	C21H22O9	418.126	419.134	-0.1	19.45	13588	+H
Ginsenoside Rs2	C55H92O23	1120.6	1165.6	1.7	26.24	13262	+HCOO, -H
Isoneobavachalcone	C17H14O5	298.084	297.077	-0.3	30.59	13076	-H
3-Hydroxymethyl-2-furfural	C6H6O3	126.032	125.024	-0.6	6.5	13061	-H
Ganwuweizic acid	C30H46O3	454.345	453.337	-1	55.8	12603	-H
2α,3β-Dihydroxyurs-12-en-28-oic acid (Corosolic acid)	C30H48O4	472.355	471.348	-0.3	37.23	12422	-H
Formononetin	C16H12O4	268.074	267.066	-0.3	25.87	11746	-H
Atractylenolide Ⅱ	C15H20O2	232.146	233.154	0	29.8	11611	+H
Resokaempferol	C15H10O5	270.053	271.06	-1.1	23.41	11606	+H
Sabinol	C10H16O	152.12	153.127	-0.5	30	11382	+H
Isoglabrolide	C30H44O4	468.324	467.317	1.8	47.56	10945	-H, +HCOO
3,5,6,7,8,3',4'-Heptemethoxyflavone	C22H24O9	432.142	431.134	-0.8	13.56	10808	-H, +HCOO
Ginsenoside Rs1	C55H92O23	1120.6	1165.6	2.2	26.74	10805	+HCOO, -H
5-Hydroxymethyl-2-furaldehyde	C6H6O3	126.032	127.039	2.5	1.16	10797	+H
Diosmetin	C16H12O6	300.063	301.071	1	17.5	10576	+H, +Na
Poricoic acid DM	C32H48O6	528.345	529.352	-0.3	23.58	10525	+H
o-Hydroxy-benzoic acid	C7H6O3	138.032	137.024	-0.6	10.21	10409	-H
Gomisin J	C22H28O6	388.189	387.182	0.5	43.96	10266	-H
3′-O-Angeloylhamaudol	C20H22O6	358.142	357.134	-0.3	23.17	9803	-H
Elemicin	C12H16O3	208.11	207.102	-1.3	26.73	9719	-H
Qinghaosu Ⅴ	C15H22O3	250.157	249.15	-0.1	35.15	9671	-H
Artemisilacetone	C15H22O3	250.157	249.15	-0.1	35.15	9671	-H
Fragransol D	C21H22O6	370.142	369.134	-0.8	24.69	9658	-H
Daidzin	C21H20O9	416.111	461.109	0.7	13.82	9621	+HCOO, -H
5-Hydroxy-3,6,7,4'-tetramethoxy falvone	C19H18O7	358.105	357.1	6	1.13	9559	-H
Wogonin	C16H12O5	284.068	285.076	-0.3	21	9365	+H
Gentisic acid	C7H6O4	154.027	153.019	0.1	8.57	9344	-H
Courmaric acid	C9H8O2	148.052	166.087	1.5	6.94	8981	+NH4, +H
Methyl-3-hydroxy-4-methoxybenzoate	C9H10O4	182.058	181.052	5.5	62.44	8969	-H
Catechol	C6H6O2	110.037	128.071	1.5	1.15	8220	+NH4, +H
Kadsuric acid	C30H46O4	470.34	469.332	-0.9	41.38	8204	-H
Benzyl d-2-methyl-butyrate	C12H16O2	192.115	191.108	-0.8	29.93	8031	-H
Corilagin	C27H22O18	634.081	635.088	0.5	13.6	8028	+H
Ledebouriellol	C20H22O7	374.137	373.129	0.5	20.08	7953	-H
BaohuosideⅠ	C27H30O10	514.184	515.191	0	29.68	7911	+H, +Na
3′-O-Acetylhamaudol	C17H18O6	318.11	319.118	0.5	32.73	7772	+H
Areaplllin	C18H16O8	360.085	359.077	-0.3	17.96	7555	-H
Ar-curcumene	C15H22	202.172	203.179	0.5	25.76	7469	+H, +Na
Psoralen	C11H6O3	186.032	187.039	2.2	22.64	7462	+H
16-Oxy-acetoxypachymic acid methyl ester	C36H56O6	584.408	585.415	0	22.09	7317	+H
Scoparone	C11H10O4	206.058	205.05	-0.7	20.29	7295	-H
2H-1-Benzopyran-2-one	C9H6O2	146.037	205.05	-0.7	20.29	7295	+CH3COO
Divaricatol	C17H18O7	334.105	335.113	0	25.87	7275	+H
Hydroxyatractylolide	C15H20O3	248.141	247.134	-0.4	54.58	7194	-H
Corylidin	C20H16O7	368.09	367.082	-1	24.84	7190	-H
Isoimperatorin	C16H14O4	270.089	271.097	0.5	30.44	7152	+H
Marmesine	C14H14O4	246.089	247.097	0.9	15.89	7147	+H
p-Hydroxybenzoic acid	C7H6O3	138.032	137.024	-0.1	9.84	7128	-H
Valeric acid	C5H10O2	102.068	147.067	7.7	62.05	6960	+HCOO, +CH3COO
Furfural	C5H4O2	96.0211	97.0283	-1.2	1.12	6848	+H, +NH4
Chrysoeriol	C16H12O6	300.063	299.056	-0.8	17.46	6753	-H
Isofraxidin	C11H10O5	222.053	223.061	4.3	5.63	6697	+H
Protocatechuic acid	C7H6O4	154.027	153.019	-0.3	8.02	6547	-H
Thymol	C10H14O	150.104	151.112	1.6	14.13	6521	+H
Tetracosanoic acid	C24H48O2	368.365	367.358	-1.7	59.67	6478	-H
β-Santonin	C15H18O3	246.126	245.118	-0.9	33.62	6423	-H
Methyl 3,4-dimethoxybenzoate	C10H12O4	196.074	195.066	-2.5	14.43	6158	-H
Mono-ethyl fumarate	C6H8O4	144.042	143.036	7.7	62.86	6155	-H, +CH3COO, +HCOO
7-Methoxycoumarin	C10H8O3	176.047	177.055	1.2	15.33	6123	+H
Terminalic acid	C20H28O3	316.204	317.211	1	26.7	6053	+H
1,3,6-Trigalloyl-β-D-glucose	C27H24O18	636.096	654.13	0.3	13.39	5856	+NH4, +H, +Na
Sagittatoside B	C32H38O14	646.226	647.234	0.7	28.01	5775	+H
Licochalcone A	C21H22O4	338.152	339.159	1.2	22.29	5710	+H
Vitexin	C21H20O10	432.106	431.098	-1	15.21	5610	-H
Isoorientin	C21H20O11	448.101	447.093	0	13.98	5445	-H
6,7-Dimethoxy-8-hydrocoumarin	C11H10O5	222.053	223.062	7.5	1.17	5131	+H, +NH4
6-Methoxykaempferol-3-O-β-D-glucopyranoside	C22H22O12	478.111	477.103	-0.7	17.52	5100	-H
Axillarin	C17H14O8	346.069	345.061	-0.5	24.17	5087	-H
Osthol	C15H16O3	244.11	245.118	3.4	16.47	5061	+H
Limettin (Citropten)	C11H10O4	206.058	205.05	-1	19.34	5045	-H
Punicalagin	C48H28O30	1084.07	1085.07	0.4	9.99	5018	+H, +NH4
Arteamisinine Ⅲ	C15H22O4	266.152	265.144	-1.4	27.13	4006	-H
Luteolin-7-O-glucoside	C21H20O11	448.101	447.094	0.6	14.26	3382	-H
Pinitol	C7H14O6	194.079	253.091	-6.2	62.05	3005	+CH3COO
6,7-Dihydroxycoumarin	C9H6O4	178.027	223.028	16	60.73	2965	+HCOO
Gomisin T	C23H30O7	418.199	417.192	0.1	26.14	2043	-H
Gomisin H	C23H30O7	418.199	417.192	0.1	26.14	2043	-H
Poricoic acid F	C31H46O5	498.335	499.342	0.1	39.61	2041	+H
Safrol	C10H10O2	162.068	161.06	-2.7	20.29	2004	-H
Succinic acid	C4H6O4	118.027	117.021	12.1	62.05	1973	-H
Phenylacetic acid	C8H8O2	136.052	135.045	-4.2	17.24	1599	-H
Artemitin	C20H20O8	388.116	387.108	-1	25.48	1407	-H
Quercetagetin	C15H10O8	318.038	317.028	-7.5	17.9	1290	-H
Anisic acid	C8H8O3	152.047	151.04	-2.1	17.37	1277	-H
Methyl cinnamate	C10H10O2	162.068	161.06	-5.2	19.34	1258	-H
Cirsimaritin	C17H14O6	314.079	313.072	-0.7	26.08	1250	-H
Isovanillin	C8H8O3	152.047	151.04	-2.2	13.56	1187	-H
Adontiol	C5H12O5	152.068	187.041	18.8	2.11	1022	+Cl
Benzyl acetate	C9H10O2	150.068	149.061	1	13.55	981	-H
Methylisoeugenol	C11H14O2	178.099	177.092	-1.8	22.33	937	-H
Trimethyl citrate	C9H14O7	234.074	293.093	16.6	25.88	838	+CH3COO
Poricoic acid B	C30H44O5	484.319	485.325	-2.1	33.68	560	+H
Isopropyl salicylate	C10H12O3	180.079	179.071	-2.3	25.23	488	-H
Methyleugenol	C11H14O2	178.099	177.093	2.9	20.56	408	-H
Hyoscyamine	C17H23NO3	289.168	290.176	3.7	28.6	397	+H
